# Supplementary material
Source: PubMed Central journal article supplement (PMC2899889)
Supplement: NIHMS216076-supplement-2.pdf [file NIHMS216076-supplement-2.pdf]

## SUPPORTING INFORMATION

Table S1. RMSDs between observed and calculated values of the dipolar coupling (DC), chemical shift anisotropy (CSA), and combined DC and CSA (TOT), obtained for each of the 24 test assignments of F24, F43, F115, F125. Assignments for F90, F107, F148 are taken from the lowest RMSD result in Table 2 (test assignment "A"). The peak numbers are as shown in Figure 1C. Data for the lowest RMSD assignment (A.20) are in bold face.

| test assignment | assignments by peak numbers |          |          |          |          |          |          | RMSD*        | RMSD*        | RMSD         |
|-----------------|-----------------------------|----------|----------|----------|----------|----------|----------|--------------|--------------|--------------|
|                 | F24                         | F43      | F90      | F107     | F115     | F125     | F148     | DC           | CSA ‡        | TOT          |
| A.1             | 3                           | 5        | 1        | 7        | 6        | 2        | 4        | 0.197        | 0.120        | 0.159        |
| A.2             | 3                           | 5        | 1        | 7        | 2        | 6        | 4        | 0.219        | 0.138        | 0.179        |
| A.3             | 3                           | 6        | 1        | 7        | 5        | 2        | 4        | 0.212        | 0.134        | 0.173        |
| A.4             | 3                           | 6        | 1        | 7        | 2        | 5        | 4        | 0.230        | 0.147        | 0.189        |
| A.5             | 3                           | 2        | 1        | 7        | 5        | 6        | 4        | 0.088        | 0.050        | 0.069        |
| A.6             | 3                           | 2        | 1        | 7        | 6        | 5        | 4        | 0.081        | 0.041        | 0.061        |
| A.7             | 5                           | 3        | 1        | 7        | 6        | 2        | 4        | 0.221        | 0.127        | 0.174        |
| A.8             | 5                           | 3        | 1        | 7        | 2        | 6        | 4        | 0.241        | 0.145        | 0.193        |
| A.9             | 5                           | 6        | 1        | 7        | 3        | 2        | 4        | 0.282        | 0.175        | 0.228        |
| A.10            | 5                           | 6        | 1        | 7        | 2        | 3        | 4        | 0.287        | 0.178        | 0.233        |
| A.11            | 5                           | 2        | 1        | 7        | 3        | 6        | 4        | 0.206        | 0.123        | 0.165        |
| A.12            | 5                           | 2        | 1        | 7        | 6        | 3        | 4        | 0.191        | 0.109        | 0.150        |
| A.13            | 6                           | 3        | 1        | 7        | 5        | 2        | 4        | 0.240        | 0.142        | 0.191        |
| A.14            | 6                           | 3        | 1        | 7        | 2        | 5        | 4        | 0.256        | 0.155        | 0.205        |
| A.15            | 6                           | 5        | 1        | 7        | 3        | 2        | 4        | 0.286        | 0.176        | 0.231        |
| A.16            | 6                           | 5        | 1        | 7        | 2        | 3        | 4        | 0.292        | 0.180        | 0.236        |
| A.17            | 6                           | 2        | 1        | 7        | 3        | 5        | 4        | 0.223        | 0.135        | 0.179        |
| A.18            | 6                           | 2        | 1        | 7        | 5        | 3        | 4        | 0.212        | 0.126        | 0.169        |
| A.19            | 2                           | 3        | 1        | 7        | 5        | 6        | 4        | 0.039        | 0.040        | 0.039        |
| <b>A.20</b>     | <b>2</b>                    | <b>3</b> | <b>1</b> | <b>7</b> | <b>6</b> | <b>5</b> | <b>4</b> | <b>0.018</b> | <b>0.028</b> | <b>0.023</b> |
| A.21            | 2                           | 5        | 1        | 7        | 3        | 6        | 4        | 0.162        | 0.112        | 0.137        |
| A.22            | 2                           | 5        | 1        | 7        | 6        | 3        | 4        | 0.142        | 0.096        | 0.119        |
| A.23            | 2                           | 6        | 1        | 7        | 3        | 5        | 4        | 0.176        | 0.123        | 0.149        |
| A.24            | 2                           | 6        | 1        | 7        | 5        | 3        | 4        | 0.162        | 0.112        | 0.137        |

\* RMSDs are scaled by the frequency range of 20 kHz.

† RMSDs are scaled by the frequency range of 150 ppm.

‡  $CSA = \hat{\delta}_{\text{bicelle}} - 125$

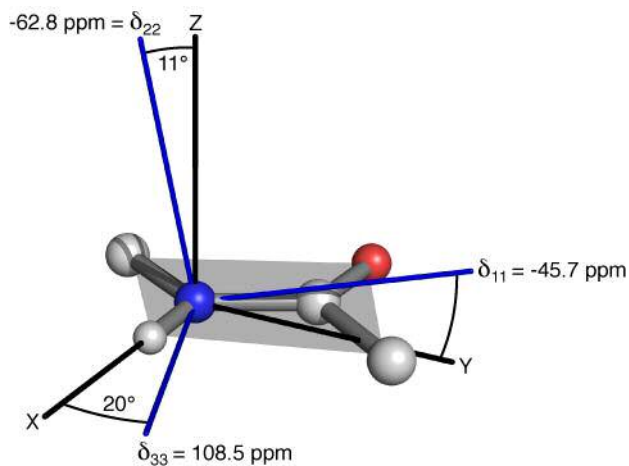

**Figure S1.** Magnitudes and orientations of the traceless components of the  $^{15}\text{N}$  chemical shift tensor used in the data analysis. The  $\delta_{33}$  component is in the plane of the peptide bond and makes an angle of  $20^\circ$  with the NH bond;  $\delta_{11}$  and  $\delta_{22}$  are rotated off the peptide plane by  $11^\circ$ ;  $\delta_{11} = -45.8$  ppm,  $\delta_{22} = -62.8$  ppm,  $\delta_{33} = 108.5$  ppm. The X, Y, Z molecular axes are defined with X parallel to the NH bond, Z perpendicular to the peptide plane, and Y orthogonal to X and Z.

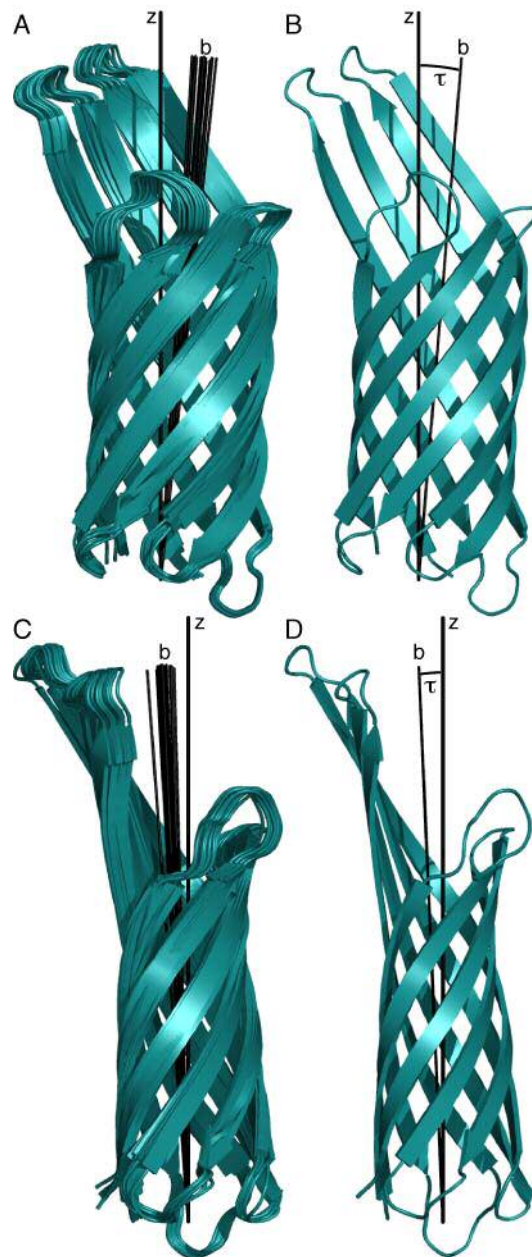

**Figure S2.** Front and side views of the membrane orientation of OmpX obtained from the experimental dipolar couplings. **(A, C)** Overlay of the 20 calculated structures and corresponding barrel axes. **(B, D)** Average of 20 calculated structures showing all the barrel axes. The average tilt angle ( $\tau$ ) between the barrel axes ( $b$ ) and the membrane normal ( $Z$ ) is  $7.3^\circ (\pm 1.6^\circ)$ .
